# Supplementary material
Source: Springer Nature journal article supplement (https://www.springermedizin.de/resource/supplementary/12987_2009_306_MOESM3_ESM.pdf/9611756)

POSITIVE CONTROL

CHOROID PLEXUS

CORTEX

HIPPOCAMPUS

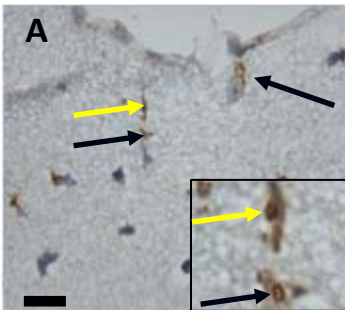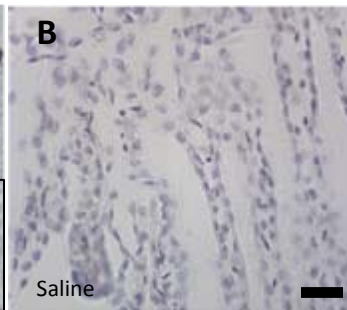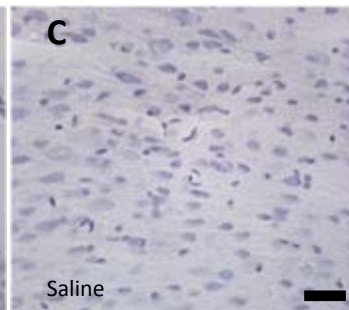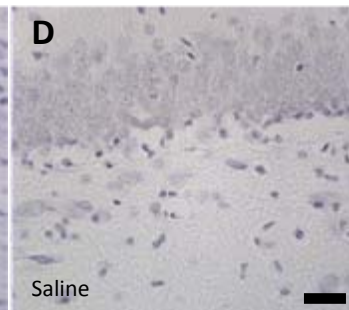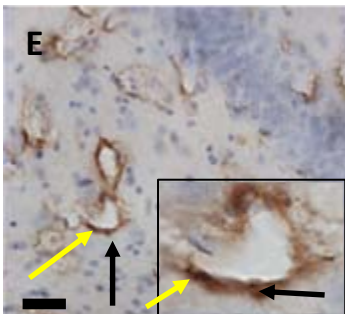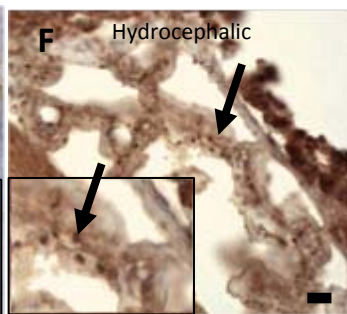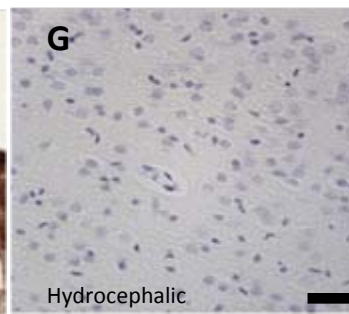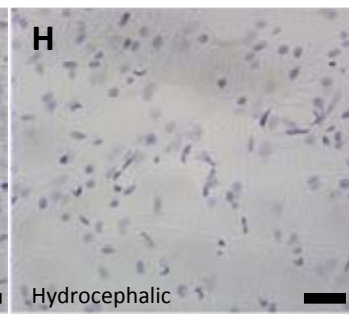

Supplement: MOESM3 [file 9611756]
